# Supplementary material
Source: PubMed Central journal article supplement (PMC9272274)
Supplement: 10-1055-s-0041-1733918-s210082.pdf [file 10-1055-s-0041-1733918-s210082.pdf]

## Appendix A: PubMed Search

("Hypophysectomy"[Mesh] OR Transsphenoid\*[Title/Abstract] OR Trans sphenoid\*[Title/Abstract] OR Endoscopic endonasal [Title/Abstract])

AND

("Cerebrospinal fluid leak"[Mesh] OR Cerebrospinal fluid leak\*[Title/Abstract] OR Cerebro spinal fluid leak\*[Title/Abstract] OR Cerebral spinal fluid leak\*[Title/Abstract] OR Cerebrospinal fluid rhinorrh\*[Title/Abstract] OR Cerebro spinal fluid rhinorrh\*[Title/Abstract] OR Cerebral spinal fluid rhinorrh\*[Title/Abstract] OR CSF leak\*[Title/Abstract] OR CSF rhinorrh\*[Title/Abstract])

## Appendix B: Embase Search

(transsphenoidal surgery"/exp OR transsphenoid\*":ab,ti OR trans sphenoid\*":ab,ti OR endoscopic endonasal\*":ab,ti)

AND

(liquorrhea"/exp OR cerebrospinal fluid leak\*":ab,ti OR cerebro spinal fluid leak\*":ab,ti OR cerebral spinal fluid leak\*":ab,ti OR cerebrospinal fluid rhinorrh\*":ab,ti OR

cerebro spinal fluid rhinorrh\*":ab,ti OR cerebral spinal fluid rhinorrh\*":ab,ti OR csf leak\*":ab,ti OR csf rhinorrh\*":ab,ti)

AND

[embase]/lim

## Appendix C: Cochrane Library Search

MeSH descriptor: [Hypophysectomy] explode all trees

OR

transsphenoid\* OR trans sphenoid\* OR endoscopic endonasal

AND

MeSH descriptor: [Cerebrospinal Fluid Leak] explode all trees

OR

cerebrospinal fluid leak\* OR cerebro spinal fluid leak\* OR cerebral spinal fluid leak\* OR cerebrospinal fluid rhinorrh\* OR cerebro spinal fluid rhinorrh\* OR cerebral spinal fluid rhinorrh\* OR csf leak\* OR csf rhinorrh\*

## Supplementary Material 1: Overview of quality assessment

**Supplementary Table S1** Overview of quality assessment case series studies

| Study                                 | Question                                            |                                                                                    |                             |                               |                                                   |                                                                                                                                       |                                                           |                                              |                                  | Quality rating |
|---------------------------------------|-----------------------------------------------------|------------------------------------------------------------------------------------|-----------------------------|-------------------------------|---------------------------------------------------|---------------------------------------------------------------------------------------------------------------------------------------|-----------------------------------------------------------|----------------------------------------------|----------------------------------|----------------|
|                                       | Was the study question or objective clearly stated? | Was the study population clearly and fully described, including a case definition? | Were the cases consecutive? | Were the subjects comparable? | Was the intervention (surgery) clearly described? | Were the outcome measures (CSF leakage) clearly defined, valid, reliable, and implemented consistently across all study participants? | Was the length of follow-up adequate (1 month or longer)? | Were the statistical methods well-described? | Were the results well-described? |                |
| Park et al <sup>24</sup> (2015)       | Yes                                                 | Yes                                                                                | CD                          | Yes                           | Yes                                               | No                                                                                                                                    | NR                                                        | NA                                           | Yes                              | Poor           |
| Fishpool et al <sup>61</sup> (2017)   | Yes                                                 | No                                                                                 | Yes                         | Yes                           | No                                                | No                                                                                                                                    | Yes                                                       | No                                           | Yes                              | Poor           |
| Sun et al <sup>55</sup> (2017)        | Yes                                                 | Yes                                                                                | CD                          | Yes                           | Yes                                               | No                                                                                                                                    | NR                                                        | NA                                           | Yes                              | Poor           |
| Ye et al <sup>52</sup> (2017)         | Yes                                                 | Yes                                                                                | CD                          | Yes                           | Yes                                               | No                                                                                                                                    | No                                                        | No                                           | Yes                              | Poor           |
| Gondim et al <sup>18</sup> (2017)     | Yes                                                 | Yes                                                                                | CD                          | Yes                           | No                                                | No                                                                                                                                    | Yes                                                       | NA                                           | Yes                              | Poor           |
| Cudal et al <sup>73</sup> (2018)      | Yes                                                 | Yes                                                                                | Yes                         | Yes                           | No                                                | No                                                                                                                                    | NR                                                        | NA                                           | Yes                              | Poor           |
| Tafreshi et al <sup>89</sup> (2020)   | Yes                                                 | Yes                                                                                | CD                          | Yes                           | No                                                | No                                                                                                                                    | NR                                                        | Yes                                          | Yes                              | Poor           |
| Nie et al <sup>41</sup> (2015)        | Yes                                                 | Yes                                                                                | CD                          | Yes                           | Yes                                               | No                                                                                                                                    | Yes                                                       | NA                                           | Yes                              | Fair           |
| Pinar et al <sup>44</sup> (2015)      | Yes                                                 | Yes                                                                                | CD                          | Yes                           | Yes                                               | No                                                                                                                                    | Yes                                                       | NA                                           | Yes                              | Fair           |
| Wang et al <sup>22</sup> (2015)       | Yes                                                 | Yes                                                                                | Yes                         | Yes                           | Yes                                               | No                                                                                                                                    | Yes                                                       | NA                                           | Yes                              | Fair           |
| Chabot et al <sup>43</sup> (2015)     | Yes                                                 | Yes                                                                                | Yes                         | Yes                           | Yes                                               | No                                                                                                                                    | NR                                                        | No                                           | Yes                              | Fair           |
| Freyschlag et al <sup>48</sup> (2016) | Yes                                                 | Yes                                                                                | Yes                         | Yes                           | No                                                | Yes                                                                                                                                   | Yes                                                       | No                                           | Yes                              | Fair           |
| Yano et al <sup>23</sup> (2017)       | Yes                                                 | Yes                                                                                | CD                          | Yes                           | No                                                | No                                                                                                                                    | Yes                                                       | Yes                                          | Yes                              | Fair           |
| Shin et al <sup>64</sup> (2017)       | Yes                                                 | Yes                                                                                | CD                          | Yes                           | No                                                | No                                                                                                                                    | Yes                                                       | Yes                                          | Yes                              | Fair           |
| Zoli et al <sup>58</sup> (2017)       | Yes                                                 | Yes                                                                                | Yes                         | Yes                           | No                                                | No                                                                                                                                    | Yes                                                       | Yes                                          | Yes                              | Fair           |
| Karamouzis et al <sup>71</sup> (2018) | Yes                                                 | Yes                                                                                | Yes                         | Yes                           | No                                                | No                                                                                                                                    | NR                                                        | Yes                                          | Yes                              | Fair           |
| Hajdari et al <sup>70</sup> (2018)    | Yes                                                 | Yes                                                                                | Yes                         | Yes                           | Yes                                               | No                                                                                                                                    | NR                                                        | Yes                                          | Yes                              | Fair           |
| Rehman et al <sup>78</sup> (2018)     | Yes                                                 | Yes                                                                                | Yes                         | Yes                           | Yes                                               | No                                                                                                                                    | NR                                                        | Yes                                          | Yes                              | Fair           |
| Chen et al <sup>16</sup> (2019)       | Yes                                                 | Yes                                                                                | Yes                         | Yes                           | Yes                                               | No                                                                                                                                    | Yes                                                       | No                                           | Yes                              | Fair           |
| Eichberg et al <sup>17</sup> (2019)   | Yes                                                 | Yes                                                                                | Yes                         | Yes                           | Yes                                               | No                                                                                                                                    | NR                                                        | NA                                           | Yes                              | Fair           |
| Shen et al <sup>60</sup> (2019)       | Yes                                                 | Yes                                                                                | CD                          | Yes                           | Yes                                               | No                                                                                                                                    | Yes                                                       | Yes                                          | Yes                              | Fair           |
| Seltzer et al <sup>21</sup> (2018)    | Yes                                                 | Yes                                                                                | Yes                         | Yes                           | No                                                | No                                                                                                                                    | Yes                                                       | NA                                           | Yes                              | Fair           |
| Pangal et al <sup>20</sup> (2020)     | Yes                                                 | Yes                                                                                | Yes                         | Yes                           | Yes                                               | No                                                                                                                                    | Yes                                                       | No                                           | Yes                              | Fair           |
| Zhang et al <sup>85</sup> (2020)      | Yes                                                 | Yes                                                                                | Yes                         | Yes                           | Yes                                               | No                                                                                                                                    | NR                                                        | NA                                           | Yes                              | Fair           |
| Cappello et al <sup>60</sup> (2020)   | Yes                                                 | Yes                                                                                | Yes                         | Yes                           | Yes                                               | No                                                                                                                                    | NR                                                        | NA                                           | Yes                              | Fair           |
| Jang et al <sup>50</sup> (2016)       | Yes                                                 | Yes                                                                                | Yes                         | Yes                           | Yes                                               | No                                                                                                                                    | Yes                                                       | Yes                                          | Yes                              | Good           |
| Han et al <sup>67</sup> (2018)        | Yes                                                 | Yes                                                                                | Yes                         | Yes                           | Yes                                               | No                                                                                                                                    | Yes                                                       | Yes                                          | Yes                              | Good           |
| Barger et al <sup>35</sup> (2018)     | Yes                                                 | Yes                                                                                | Yes                         | Yes                           | Yes                                               | Yes                                                                                                                                   | NR                                                        | Yes                                          | Yes                              | Good           |
| Fallah et al <sup>78</sup> (2019)     | Yes                                                 | Yes                                                                                | Yes                         | Yes                           | Yes                                               | No                                                                                                                                    | Yes                                                       | Yes                                          | Yes                              | Good           |
| Parikh et al <sup>88</sup> (2020)     | Yes                                                 | Yes                                                                                | Yes                         | Yes                           | No                                                | Yes                                                                                                                                   | Yes                                                       | Yes                                          | Yes                              | Good           |

Legend

|                  |                |              |                  |                      |                   |
|------------------|----------------|--------------|------------------|----------------------|-------------------|
| CD               | NA             | NR           | Yes              | CD/NA/NR             | No                |
| Cannot determine | Not applicable | Not reported | Low risk of bias | Unclear risk of bias | High risk of bias |

**Supplementary Table S2 Overview of quality assessment cohort studies**

| Study                                     | Bias                                     |                                    |                           |                                                                          |                                                                 |                       |                                                 |                                  | Quality rating |
|-------------------------------------------|------------------------------------------|------------------------------------|---------------------------|--------------------------------------------------------------------------|-----------------------------------------------------------------|-----------------------|-------------------------------------------------|----------------------------------|----------------|
|                                           | Representativeness of the exposed cohort | Selection of the nonexposed cohort | Ascertainment of exposure | Demonstration that outcome of interest was not present at start of study | Comparability of cohorts on the basis of the design or analysis | Assessment of outcome | Was follow-up long enough for outcomes to occur | Adequacy of follow up of cohorts |                |
| Ishii et al <sup>25</sup> (2015)          | *                                        | *                                  | *                         | *                                                                        | -                                                               | *                     | B                                               | D                                | Poor           |
| Pines et al <sup>15</sup> (2015)          | *                                        | *                                  | *                         | *                                                                        | -                                                               | *                     | B                                               | D                                | Poor           |
| Fujimoto et al <sup>59</sup> (2017)       | *                                        | *                                  | *                         | *                                                                        | -                                                               | *                     | B                                               | D                                | Poor           |
| Levi et al <sup>37</sup> (2017)           | *                                        | *                                  | *                         | *                                                                        | -                                                               | *                     | B                                               | D                                | Poor           |
| Schuss et al <sup>69</sup> (2018)         | *                                        | *                                  | *                         | *                                                                        | -                                                               | *                     | B                                               | D                                | Poor           |
| Robins et al <sup>74</sup> (2018)         | *                                        | *                                  | *                         | *                                                                        | -                                                               | *                     | B                                               | D                                | Poor           |
| Rieleley et al <sup>84</sup> (2020)       | *                                        | *                                  | *                         | *                                                                        | -                                                               | *                     | B                                               | D                                | Poor           |
| Sanders-Taylor et al <sup>45</sup> (2015) | *                                        | *                                  | *                         | *                                                                        | -                                                               | *                     | *                                               | *                                | Poor           |
| Zhan et al <sup>42</sup> (2015)           | *                                        | *                                  | *                         | *                                                                        | **                                                              | *                     | B                                               | D                                | Fair           |
| Zaidi et al <sup>54</sup> (2016)          | *                                        | *                                  | *                         | *                                                                        | **                                                              | *                     | B                                               | D                                | Fair           |
| Gao et al <sup>47</sup> (2016)            | *                                        | *                                  | *                         | *                                                                        | -                                                               | *                     | B                                               | *                                | Fair           |
| Park et al <sup>49</sup> (2016)           | *                                        | *                                  | *                         | *                                                                        | -                                                               | *                     | *                                               | D                                | Fair           |
| Ajlan et al <sup>62</sup> (2017)          | *                                        | *                                  | *                         | *                                                                        | -                                                               | *                     | *                                               | D                                | Fair           |
| Cebula et al <sup>57</sup> (2017)         | *                                        | *                                  | *                         | *                                                                        | -                                                               | *                     | *                                               | *                                | Fair           |
| Fnaiss et al <sup>51</sup> (2017)         | *                                        | *                                  | *                         | *                                                                        | -                                                               | *                     | B                                               | *                                | Fair           |
| Zhou et al <sup>56</sup> (2017)           | *                                        | *                                  | *                         | *                                                                        | *                                                               | *                     | B                                               | *                                | Fair           |
| Sasagawa et al <sup>60</sup> (2017)       | *                                        | *                                  | *                         | *                                                                        | **                                                              | *                     | B                                               | D                                | Fair           |
| Patel et al <sup>13</sup> (2018)          | *                                        | *                                  | *                         | *                                                                        | **                                                              | *                     | B                                               | D                                | Fair           |
| Guo et al <sup>68</sup> (2018)            | *                                        | *                                  | *                         | *                                                                        | **                                                              | *                     | B                                               | D                                | Fair           |
| Hanasuta et al <sup>38</sup> (2018)       | *                                        | *                                  | *                         | *                                                                        | -                                                               | *                     | *                                               | *                                | Fair           |
| Lofrese et al <sup>72</sup> (2018)        | *                                        | *                                  | *                         | *                                                                        | **                                                              | *                     | B                                               | D                                | Fair           |
| Popov et al <sup>66</sup> (2018)          | *                                        | *                                  | *                         | *                                                                        | **                                                              | *                     | B                                               | D                                | Fair           |
| Xue et al <sup>77</sup> (2021)            | *                                        | *                                  | *                         | *                                                                        | **                                                              | *                     | B                                               | D                                | Fair           |
| Memel et al <sup>83</sup> (2019)          | *                                        | *                                  | *                         | *                                                                        | -                                                               | *                     | *                                               | D                                | Fair           |
| Castañó-Leon et al <sup>87</sup> (2020)   | *                                        | *                                  | *                         | *                                                                        | **                                                              | *                     | B                                               | D                                | Fair           |
| Liu et al <sup>95</sup> (2020)            | *                                        | *                                  | *                         | *                                                                        | *                                                               | *                     | B                                               | D                                | Fair           |
| Fathalla et al <sup>40</sup> (2015)       | *                                        | *                                  | *                         | *                                                                        | *                                                               | *                     | *                                               | *                                | Good           |
| Gondim et al <sup>39</sup> (2015)         | *                                        | *                                  | *                         | *                                                                        | **                                                              | *                     | *                                               | *                                | Good           |
| Xie et al <sup>46</sup> (2016)            | *                                        | *                                  | *                         | *                                                                        | **                                                              | *                     | *                                               | D                                | Good           |
| Przybyłowski et al <sup>83</sup> (2017)   | *                                        | *                                  | *                         | *                                                                        | **                                                              | *                     | *                                               | *                                | Good           |
| Negm et al <sup>19</sup> (2017)           | *                                        | *                                  | *                         | *                                                                        | **                                                              | *                     | *                                               | D                                | Good           |
| Ding et al <sup>26</sup> (2017)           | *                                        | *                                  | *                         | *                                                                        | *                                                               | *                     | *                                               | *                                | Good           |
| Wang et al <sup>54</sup> (2017)           | *                                        | *                                  | *                         | *                                                                        | **                                                              | *                     | *                                               | D                                | Good           |
| Karki et al <sup>53</sup> (2017)          | *                                        | *                                  | *                         | *                                                                        | **                                                              | *                     | *                                               | D                                | Good           |
| Wilson et al <sup>75</sup> (2018)         | *                                        | *                                  | *                         | *                                                                        | **                                                              | *                     | *                                               | D                                | Good           |
| Eseonu et al <sup>55</sup> (2018)         | *                                        | *                                  | *                         | *                                                                        | **                                                              | *                     | *                                               | D                                | Good           |
| Chen et al <sup>81</sup> (2019)           | *                                        | *                                  | *                         | *                                                                        | **                                                              | *                     | B                                               | *                                | Good           |
| Spina et al <sup>79</sup> (2019)          | *                                        | *                                  | *                         | *                                                                        | **                                                              | *                     | *                                               | *                                | Good           |
| Azab et al <sup>52</sup> (2019)           | *                                        | *                                  | *                         | *                                                                        | **                                                              | *                     | *                                               | D                                | Good           |
| Tardivo et al <sup>86</sup> (2020)        | *                                        | *                                  | *                         | *                                                                        | **                                                              | *                     | *                                               | D                                | Good           |

Legend

|    |              |                  |                      |                   |
|----|--------------|------------------|----------------------|-------------------|
| B  | D            | */**             | B/D                  | -                 |
| No | No statement | Low risk of bias | Unclear risk of bias | High risk of bias |
